# Supplementary material for: Sensor-based characterization of daily walking: a new paradigm in pre-frailty/frailty assessment
Source: PubMed Central journal article supplement (PMC7203790; doi:10.1186/s12877-020-01572-1), 2020-05-06

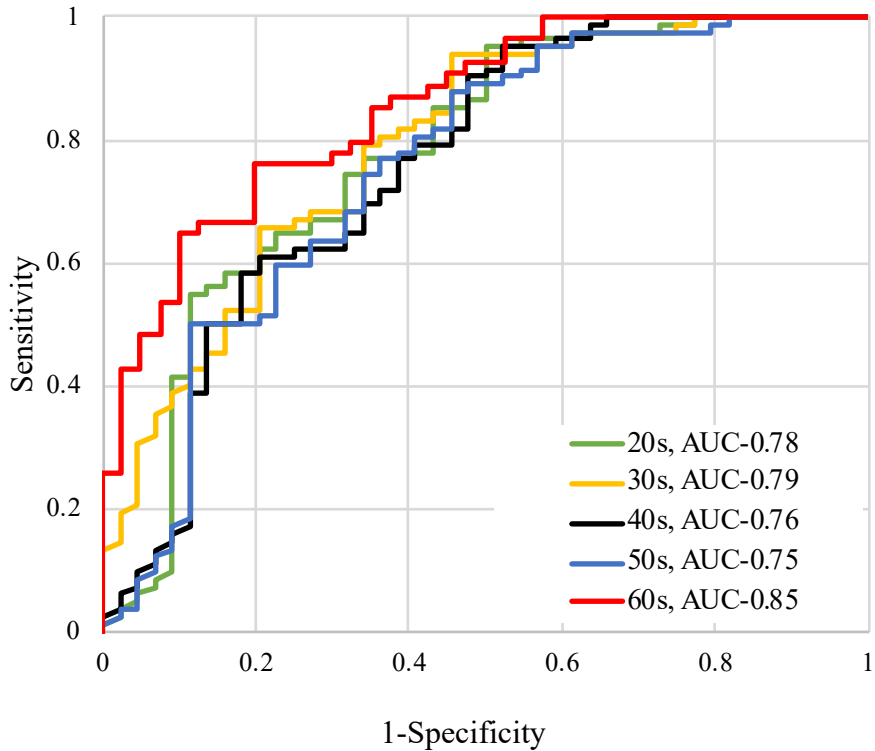

Supplement: 12877_2020_1572_MOESM2_ESM.pdf [file 12877_2020_1572_MOESM2_ESM.pdf]
